# Supplementary material for: Norisoprenoids from the Brown Alga Sargassum naozhouense Tseng et Lu
Source: MDPI journal article supplement (doi:10.3390/molecules23020348), 2018-02-07
Supplement: s1 [file s1]

# COSY NMR Spectrum of S-E-3(1)

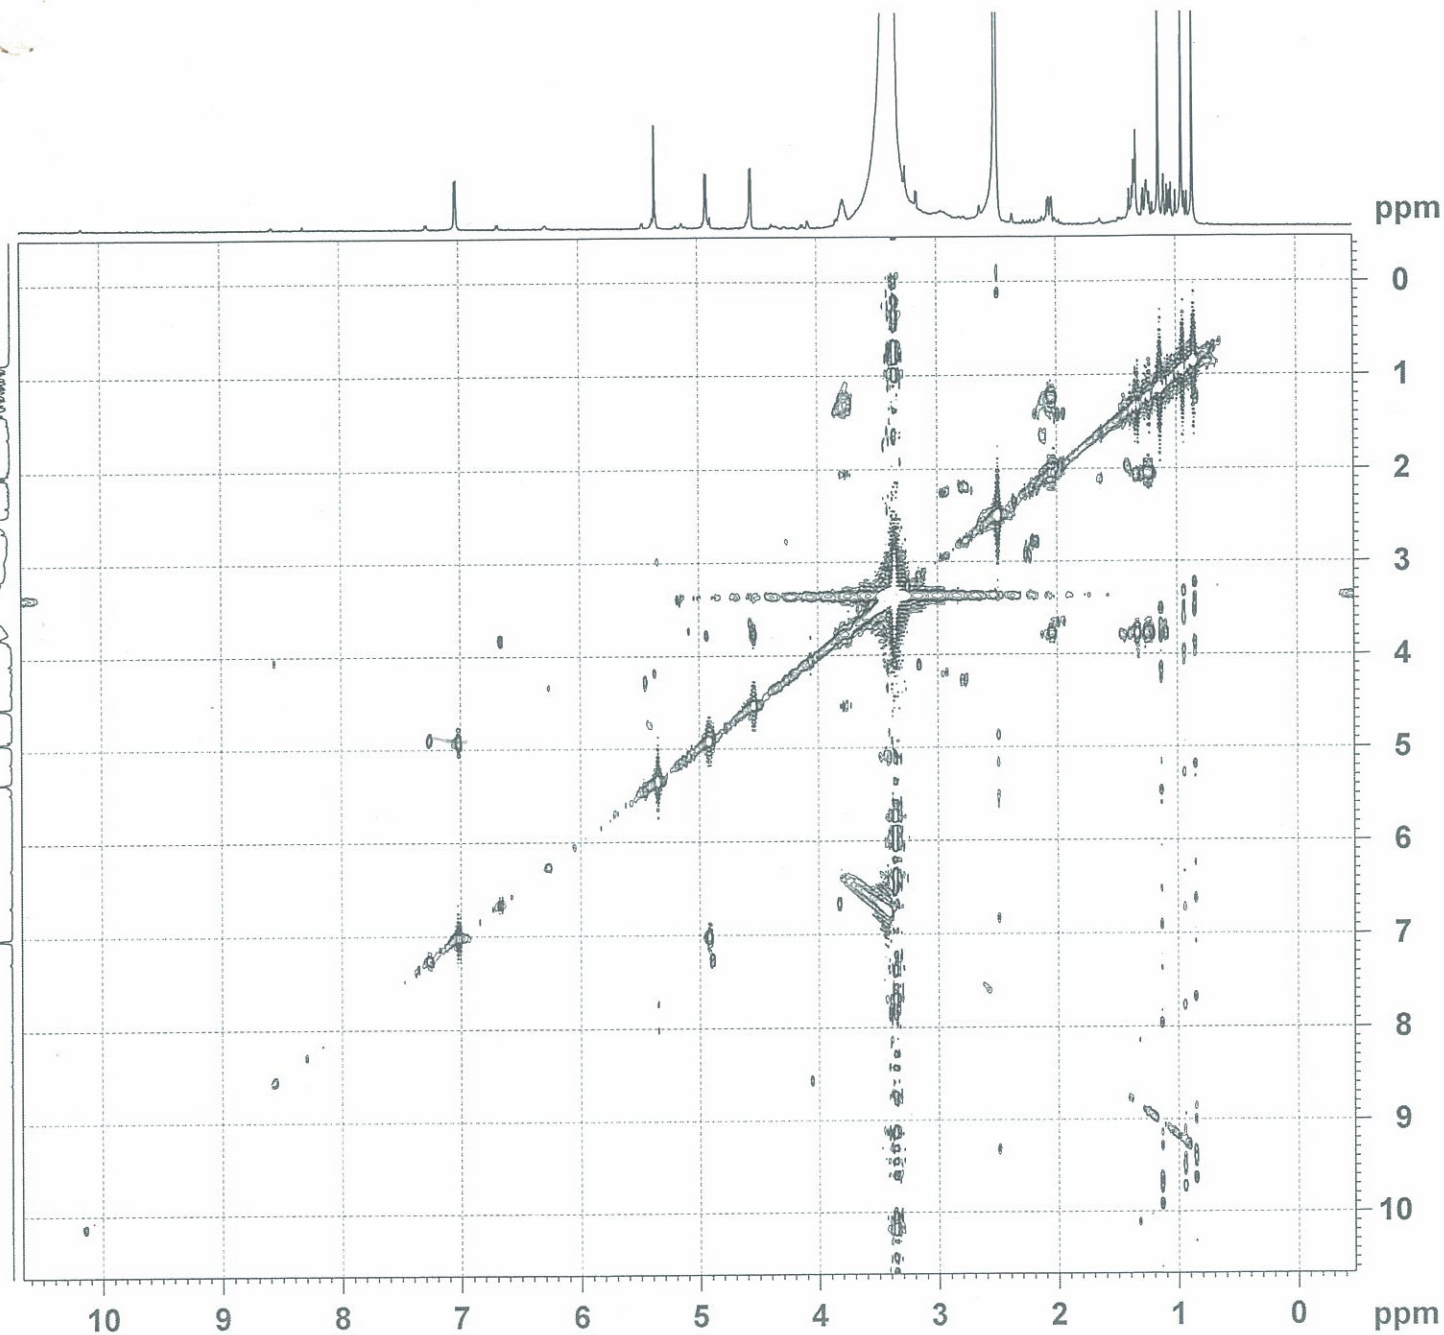

```

NAME      pengyan-S-E-3(1)
EXPNO     6
PROCNO    1
Date_     20120907
Time      20.47
INSTRUM   spect
PROBHD    5 mm PABBO BB-
PULPROG   cosygpgf
TD        2048
SOLVENT   DMSO
NS        24
DS        8
SWH       5580.357 Hz
FIDRES    2.724784 Hz
AQ        0.1836404 sec
RG        64
DW        89.600 usec
DE        6.50 usec
TE        297.9 K
D0        0.00000300 sec
D1        1.00000000 sec
D13       0.00000400 sec
D16       0.00020000 sec
IN0       0.00017920 sec

===== CHANNEL f1 =====
NUC1      1H
P0        13.50 usec
P1        13.50 usec
PL1       1.00 dB
PL1W      8.77915382 W
SFO1      500.1325507 MHz

===== GRADIENT CHANNEL =====
GPNAM1    SINE.100
GPZ1      10.00 %
P16       1000.00 usec
ND0       1
TD        128
SFO1      500.1326 MHz
FIDRES    43.596321 Hz
SW        11.158 ppm
FnMODE    QF
SI        1024
SF        500.1300052 MHz
WDW       SINE
SSB       0
LB        0.00 Hz
GB        0
PC        1.40
SI        1024
MC2       QF
SF        500.1300052 MHz
WDW       SINE
SSB       0
LB        0.00 Hz
GB        0
    
```
