# Supplementary material for: Norisoprenoids from the Brown Alga Sargassum naozhouense Tseng et Lu
Source: MDPI journal article supplement (doi:10.3390/molecules23020348), 2018-02-07
Supplement: s1 [file s1]

# **<sup>1</sup>H NMR Spectrum of S-E-3(1)**

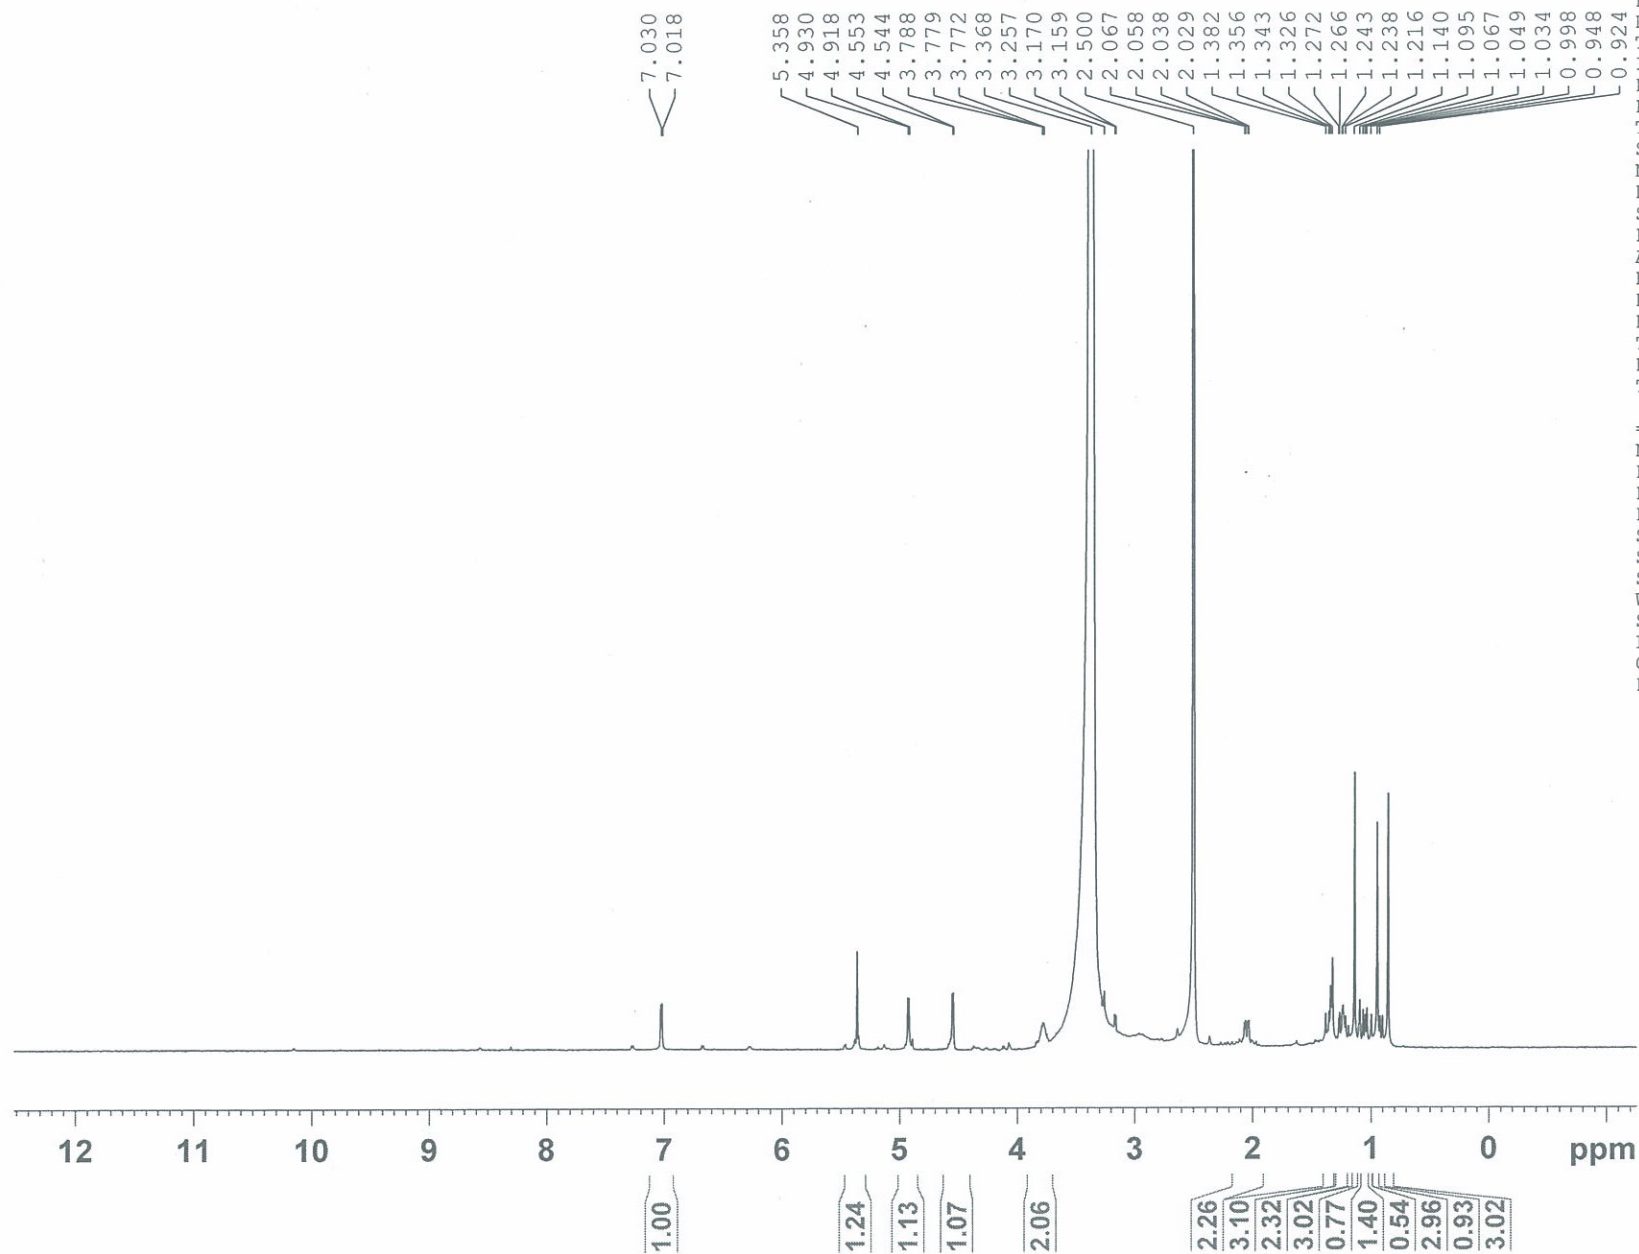

NAME pengyan-S-E-3(1)  
 EXPNO 1  
 PROCNO 1  
 Date\_ 20120827  
 Time\_ 11.49  
 INSTRUM spect  
 PROBHD 5 mm PABBO BB-  
 PULPROG zg30  
 TD 65536  
 SOLVENT DMSO  
 NS 66  
 DS 2  
 SWH 10330.578 Hz  
 FIDRES 0.157632 Hz  
 AQ 3.1720407 se  
 RG 128  
 DW 48.400 us  
 DE 6.50 us  
 TE 297.9 K  
 D1 1.00000000 se  
 TD0 1

===== CHANNEL f1 =====  
 NUC1 1H  
 P1 13.50 us  
 PL1 1.00 dB  
 PL1W 8.77915382 W  
 SFO1 500.1330885 MH  
 SI 32768  
 SF 500.1300052 MH  
 WDW EM  
 SSB 0  
 LB 0.30 Hz  
 GB 0  
 PC 1.00
