# Supplementary material for: Norisoprenoids from the Brown Alga Sargassum naozhouense Tseng et Lu
Source: MDPI journal article supplement (doi:10.3390/molecules23020348), 2018-02-07
Supplement: s1 [file s1]

# **<sup>13</sup>C NMR Spectrum of S-E-3(1)**

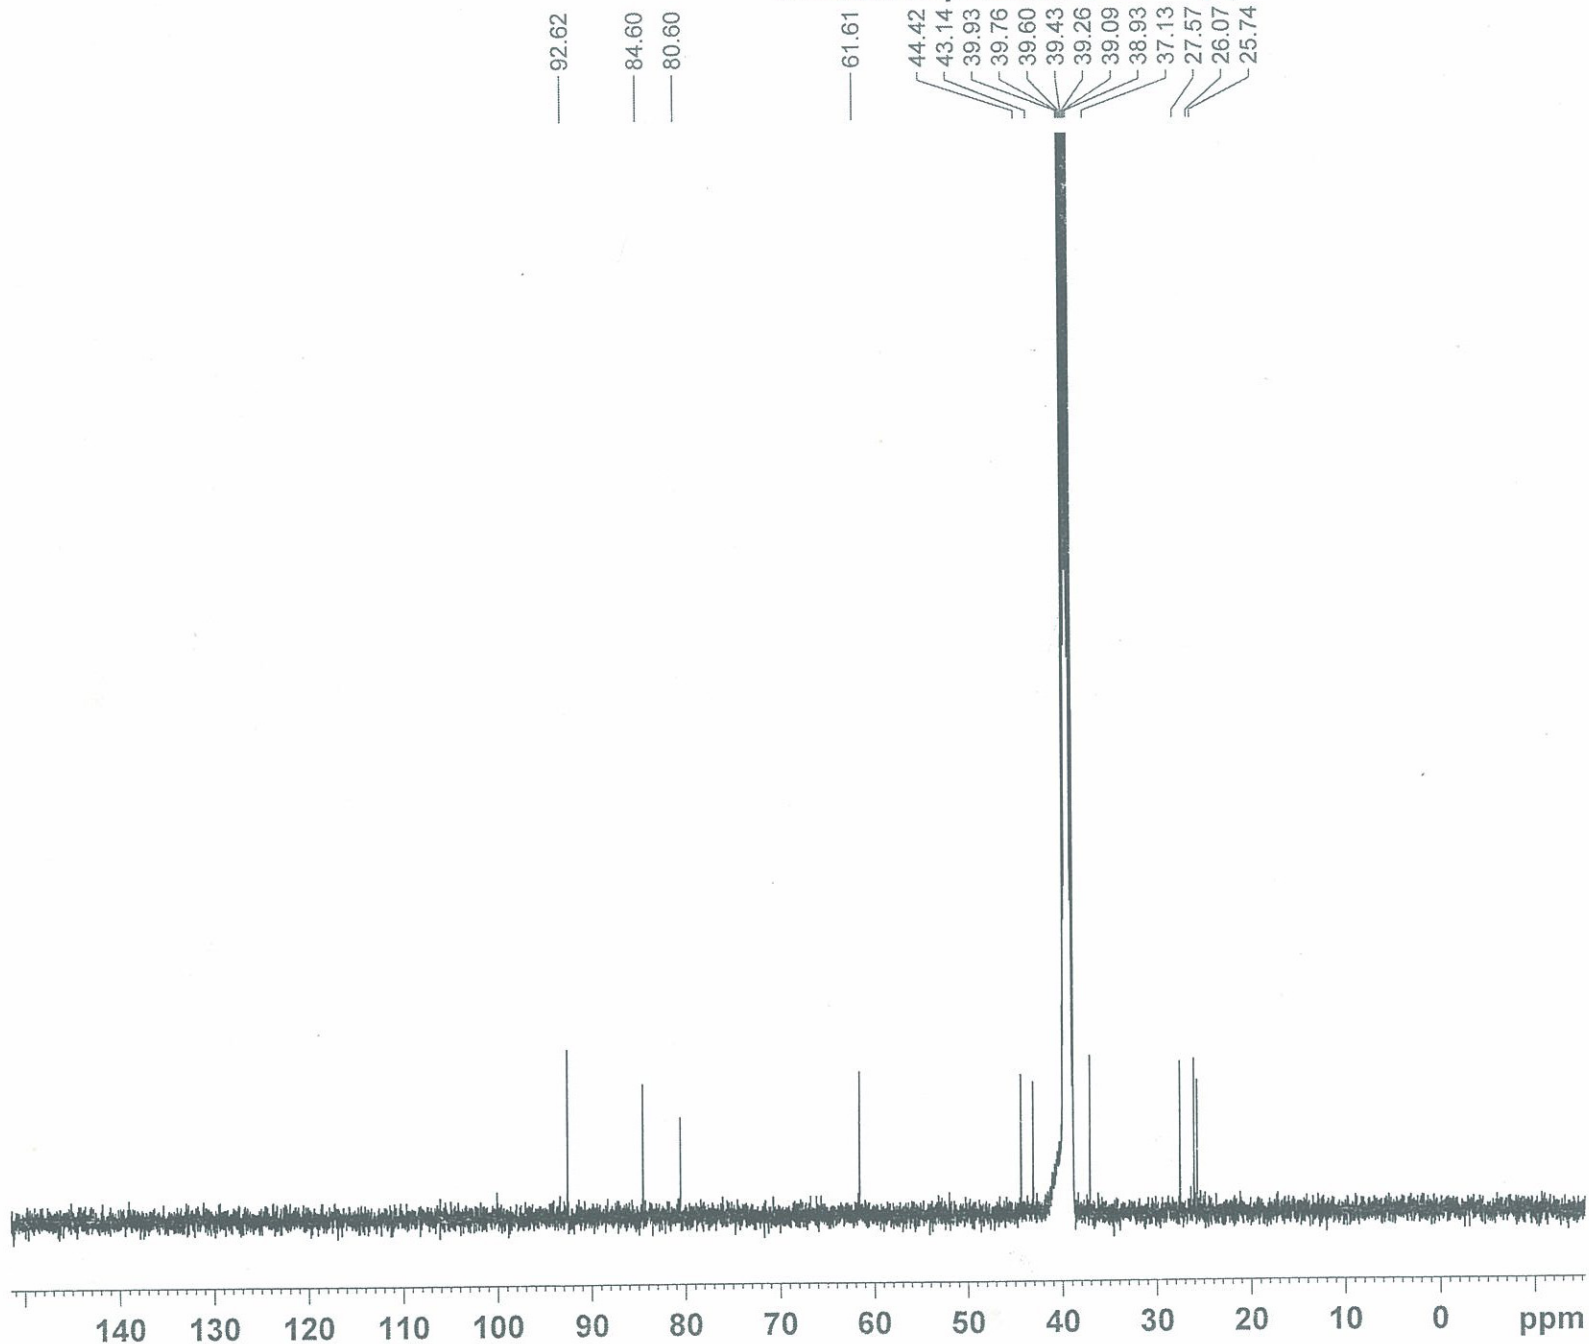

```

NAME      pengyan-S-E-3(1)
EXPNO     2
PROCNO    1
Date_     20120906
Time      20.31
INSTRUM   spect
PROBHD    5 mm PABBO BB-
PULPROG   zgpg30
TD         32768
SOLVENT   DMSO
NS         10240
DS         4
SWH        30030.029 Hz
FIDRES     0.916444 Hz
AQ         0.5456539 sec
RG          9195.2
DW          16.650 usec
DE          6.50 usec
TE         298.8 K
D1         1.00000000 sec
D11        0.03000000 sec
TD0        1
  
```

```

===== CHANNEL f1 =====
NUC1      13C
P1         10.00 usec
PL1        0.00 dB
PL1W       100.47545624 W
SFO1      125.7703643 MHz
  
```

```

===== CHANNEL f2 =====
CPDPRG2   waltz16
NUC2       1H
PCPD2      80.00 usec
PL2         1.00 dB
PL12       16.46 dB
PL13       17.46 dB
PL2W       8.77915382 W
PL12W      0.24971968 W
PL13W      0.19835939 W
SFO2       500.1320005 MHz
SI         32768
SF         125.7578658 MHz
WDW        EM
SSB         0
LB          1.00 Hz
GB          0
PC          1.40
  
```
