# Supplementary material for: Norisoprenoids from the Brown Alga Sargassum naozhouense Tseng et Lu
Source: MDPI journal article supplement (doi:10.3390/molecules23020348), 2018-02-07
Supplement: s1 [file s1]

# HSQC NMR Spectrum of S-E-3(1)

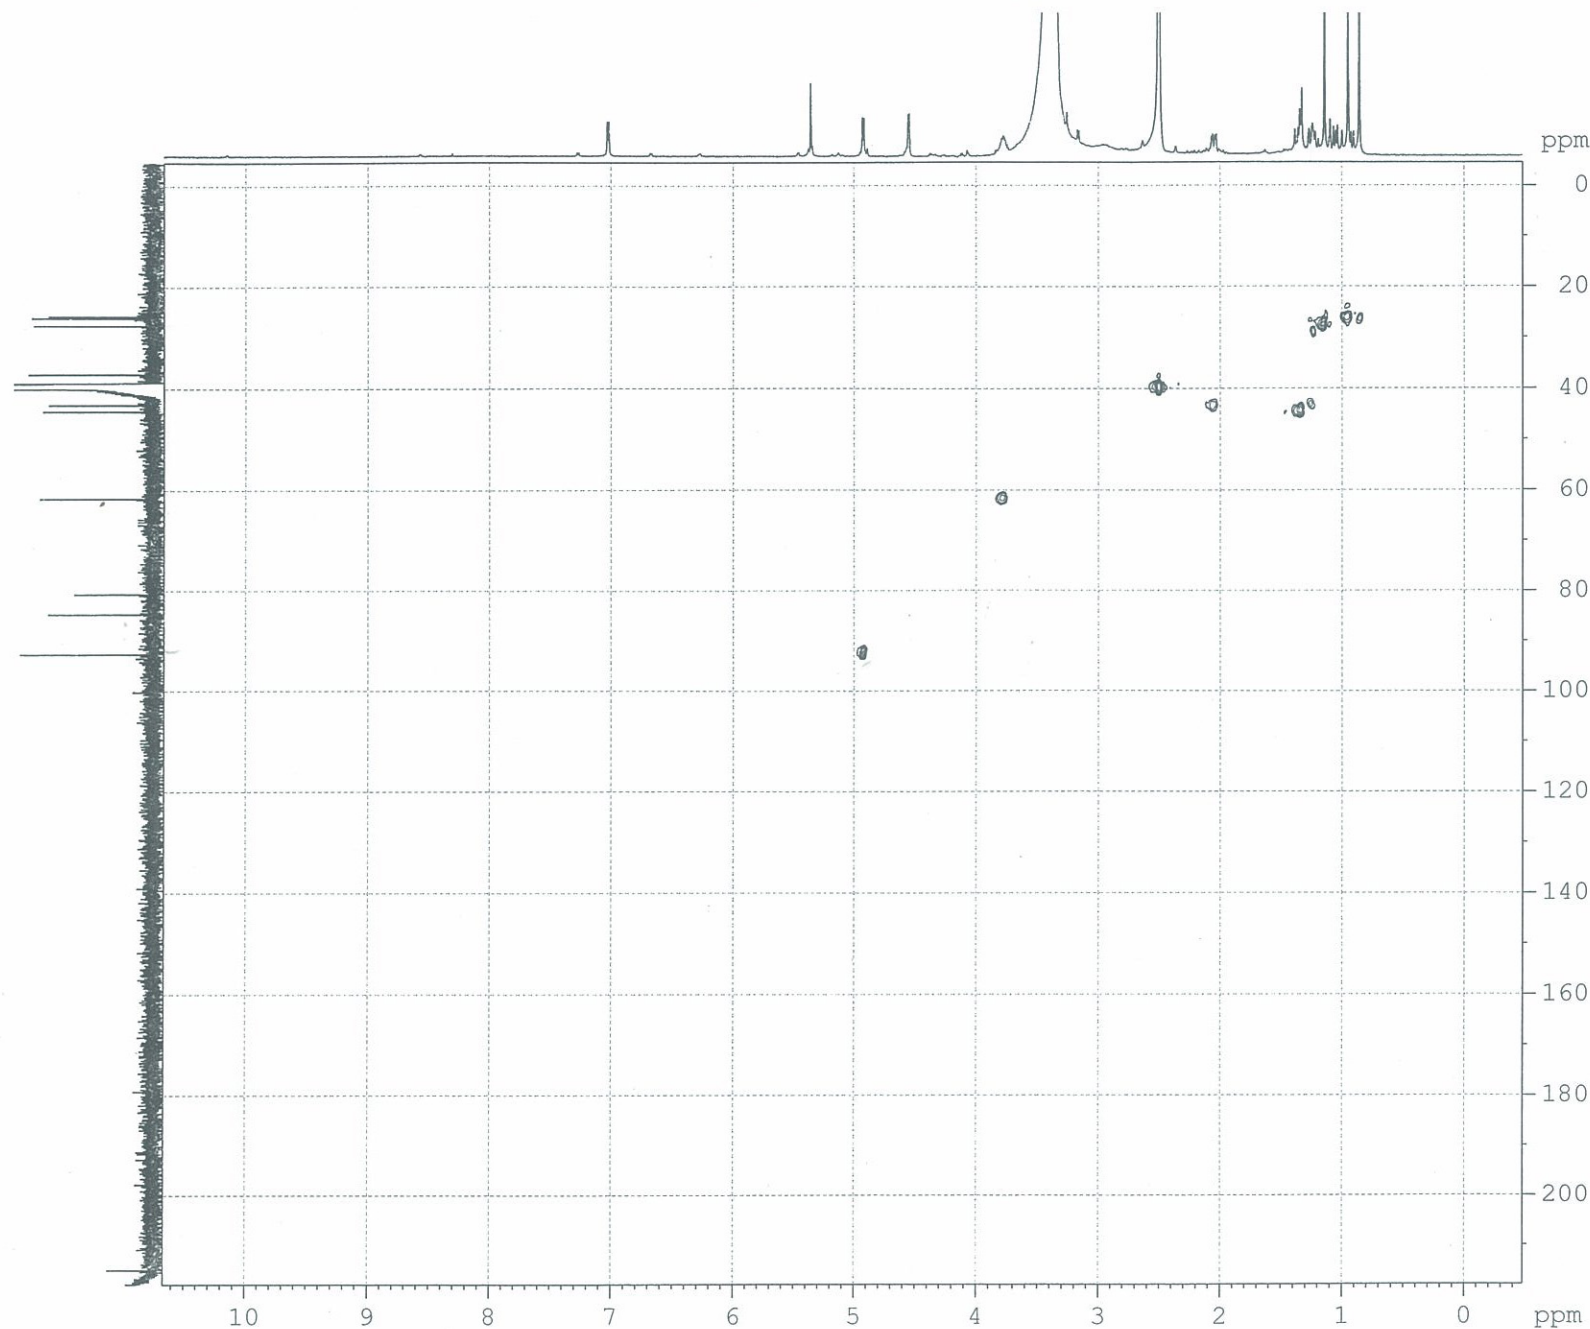

```

NAME      pengyan-S-E-3(1)
EXPNO     5
PROCNO    1
Date_     20120907
Time      23.34
INSTRUM   spect
PROBHD    5 mm PABBO BB-
PULPROG   hsqcedetgp
TD        1024
SOLVENT   DMSO
NS        32
DS        16
SWH       5580.357 Hz
FIDRES    5.449567 Hz
AQ        0.0918900 sec
RG        18390.4
DW        89.600 usec
DE        6.50 usec
TE        298.0 K
CNST2     145.0000000
D0        0.00000300 sec
D1        1.00000000 sec
D4        0.00172414 sec
D11       0.03000000 sec
D13       0.00000400 sec
D16       0.00020000 sec
D21       0.00345000 sec
IN0       0.00001785 sec
ZGPTNS

===== CHANNEL f1 =====
NUC1      1H
P1        13.50 usec
P2        27.00 usec
P28       0.00 usec
PL1       1.00 dB
PL1W      8.77915382 W
SFO1      500.1325507 MHz

===== CHANNEL f2 =====
CPDPRG2   garp
NUC2      13C
P3        10.00 usec
P4        20.00 usec
PCPD2     65.00 usec
PL2       0.00 dB
PL12      16.26 dB
PL2W      100.47545624 W
PL12W     2.37716842 W
SFO2      125.7712577 MHz

===== GRADIENT CHANNEL =====
GPNAM1    SINE.100
GPNAM2    SINE.100
GPZ1      80.00 %
GPZ2      20.10 %
P16       1000.00 usec
ND0       2
TD        128
SFO1      125.7713 MHz
FIDRES    218.822342 Hz
SW        222.700 ppm
FnMODE    Echo-Antiecho
SI        1024
SF        500.1300052 MHz
WDW
CTF
    
```
