# Supplementary material for: Norisoprenoids from the Brown Alga Sargassum naozhouense Tseng et Lu
Source: MDPI journal article supplement (doi:10.3390/molecules23020348), 2018-02-07
Supplement: s1 [file s1]

# HMBC NMR Spectrum of S-E-3(1)

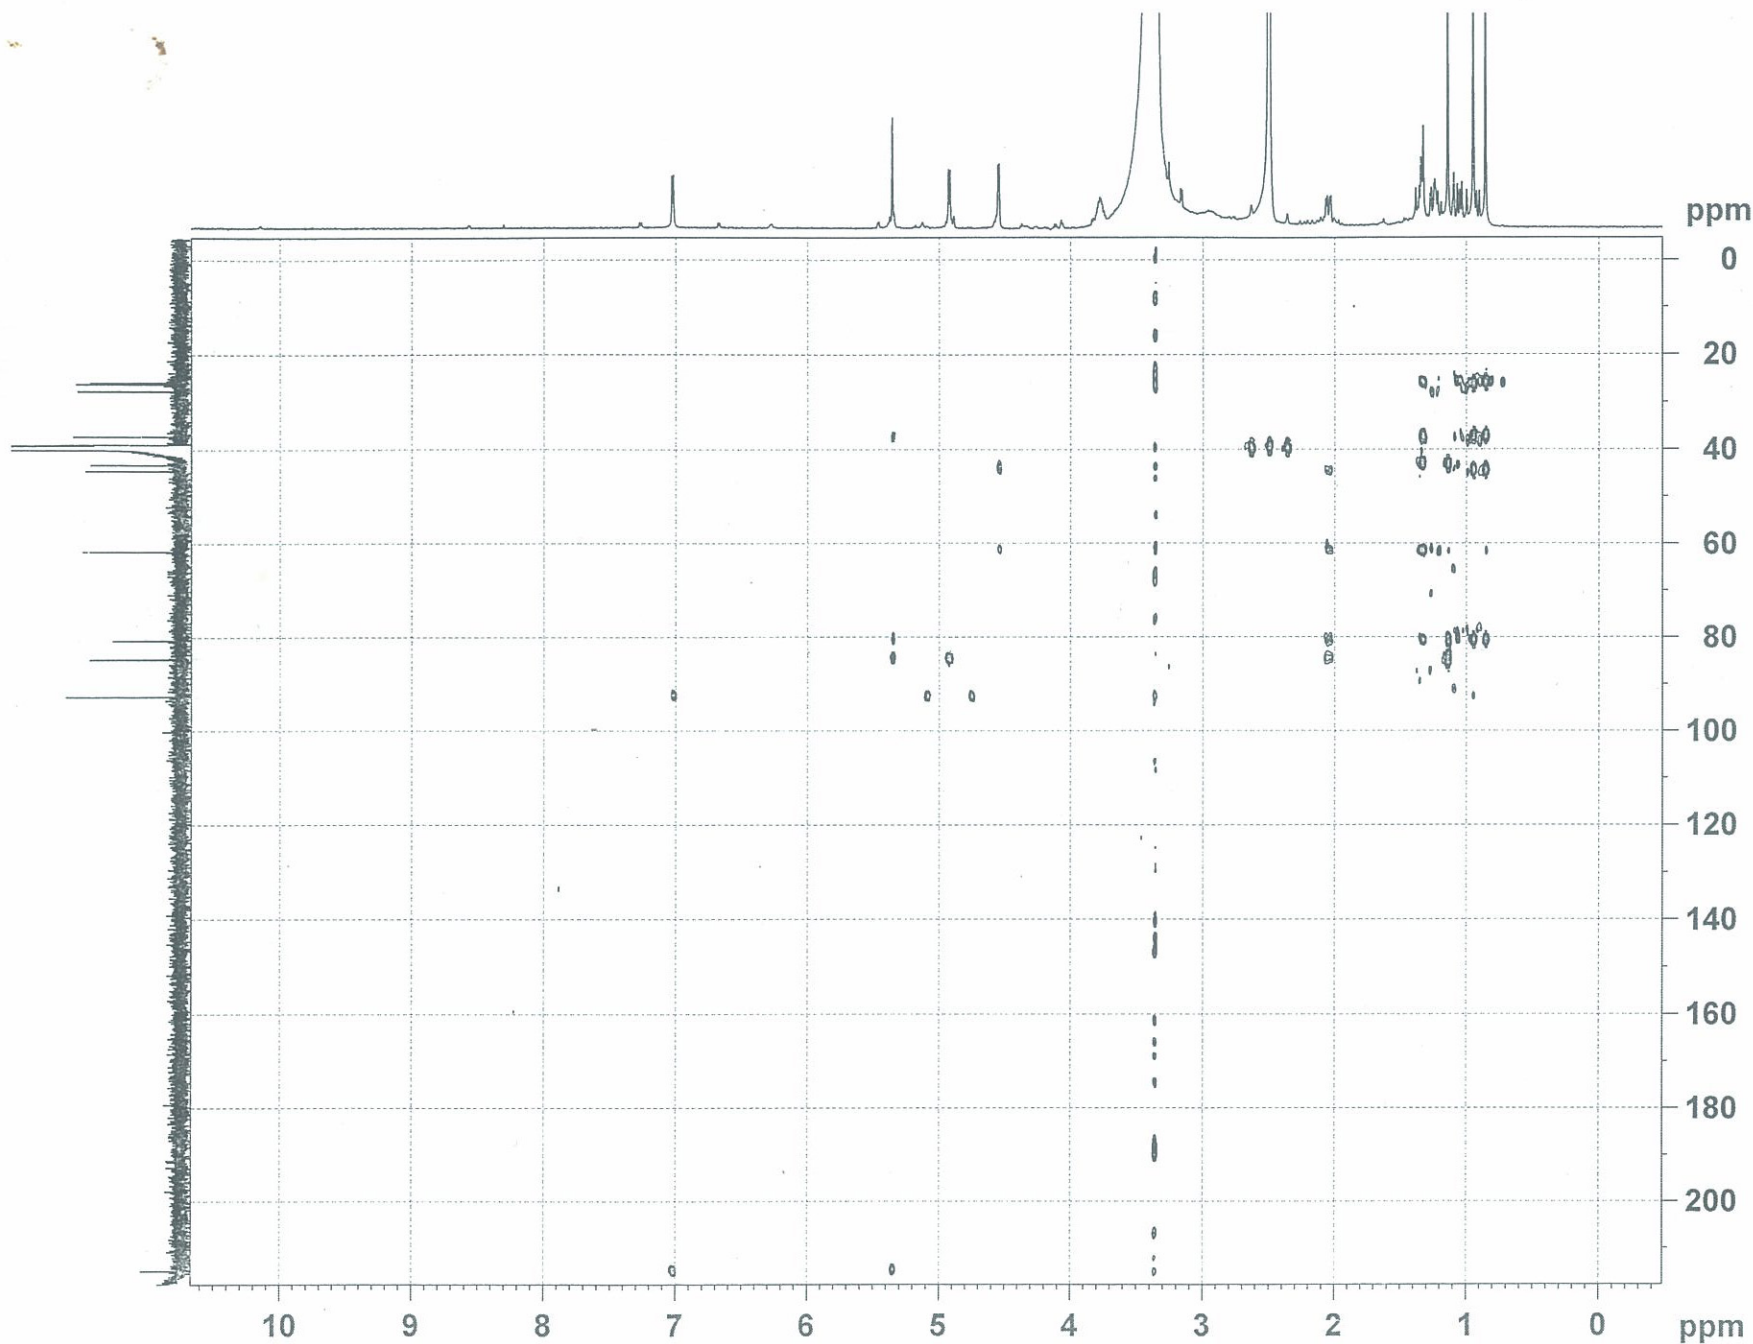

```

NAME pengyan-S-E-3(1)
EXPNO 4
PROCNO 1
Date_ 20120907
Time 17.55
INSTRUM spect
PROBHD 5 mm PABBO BB-
PULPROG hmbcgpndqf
TD 4096
SOLVENT DMSO
NS 56
DS 16
SWH 5580.357 Hz
FIDRES 1.362392 Hz
AQ 0.3671412 sec
RG 16384
DW 89.600 usec
DE 6.50 usec
TE 298.4 K
CNST13 8.0000000
D0 0.00000300 sec
D1 1.00000000 sec
D6 0.06250000 sec
D16 0.00020000 sec
INO 0.00001785 sec

===== CHANNEL f1 =====
NUC1 1H
P1 13.50 usec
P2 27.00 usec
PL1 1.00 dB
PL1W 8.77915382 W
SFO1 500.1325507 MHz

===== CHANNEL f2 =====
NUC2 13C
P3 10.00 usec
PL2 0.00 dB
PL2W 100.47545624 W
SFO2 125.7712577 MHz

===== GRADIENT CHANNEL =====
GPNAM1 SINE.100
GPNAM2 SINE.100
GPNAM3 SINE.100
GPZ1 50.00 %
GPZ2 30.00 %
GPZ3 40.10 %
P16 1000.00 usec
ND0 2
TD 128
SFO1 125.7713 MHz
FIDRES 218.822342 Hz
SW 222.700 ppm
FnMODE QF
SI 1024
SF 500.1300052 MHz
WDW SINE
SSB 0
LB 0.00 Hz
GB 0
PC 1.40
SI 1024
MC2 QF
SF 125.7578658 MHz
WDW SINE
SSB 0
LB 0.00 Hz
GB 0
  
```
