# Supplementary material for: Norisoprenoids from the Brown Alga Sargassum naozhouense Tseng et Lu
Source: MDPI journal article supplement (doi:10.3390/molecules23020348), 2018-02-07

# NOE NMR Spectrum of S-E-3(1)

NAME pengyan-S-E-3(1)  
 EXPNO 7  
 PROCNO 1  
 Date\_ 20120907  
 Time 21.49  
 INSTRUM spect  
 PROBHD 5 mm PABBO BB-  
 PULPROG noesyph  
 TD 2048  
 SOLVENT DMSO  
 NS 32  
 DS 4  
 SWH 5580.357 Hz  
 FIDRES 2.724784 Hz  
 AQ 0.1836404 sec  
 RG 64  
 DW 89.600 usec  
 DE 6.50 usec  
 TE 297.9 K  
 D0 0.00007241 sec  
 D1 1.00000000 sec  
 D8 0.30000001 sec  
 IN0 0.00017920 sec

===== CHANNEL f1 =====  
 NUC1 1H  
 P1 13.50 usec  
 PL1 1.00 dB  
 PL1W 8.77915382 W  
 SFO1 500.1325507 MHz  
 ND0 1  
 TD 128  
 SFO1 500.1326 MHz  
 FIDRES 43.596710 Hz  
 SW 11.158 ppm  
 FnMODE States-TPPI  
 SI 1024  
 SF 500.1300052 MHz  
 WDW QSINE  
 SSB 2  
 LB 0.00 Hz  
 GB 0  
 PC 1.00  
 SI 1024  
 MC2 States-TPPI  
 SF 500.1300052 MHz  
 WDW QSINE  
 SSB 2  
 LB 0.00 Hz  
 GB 0

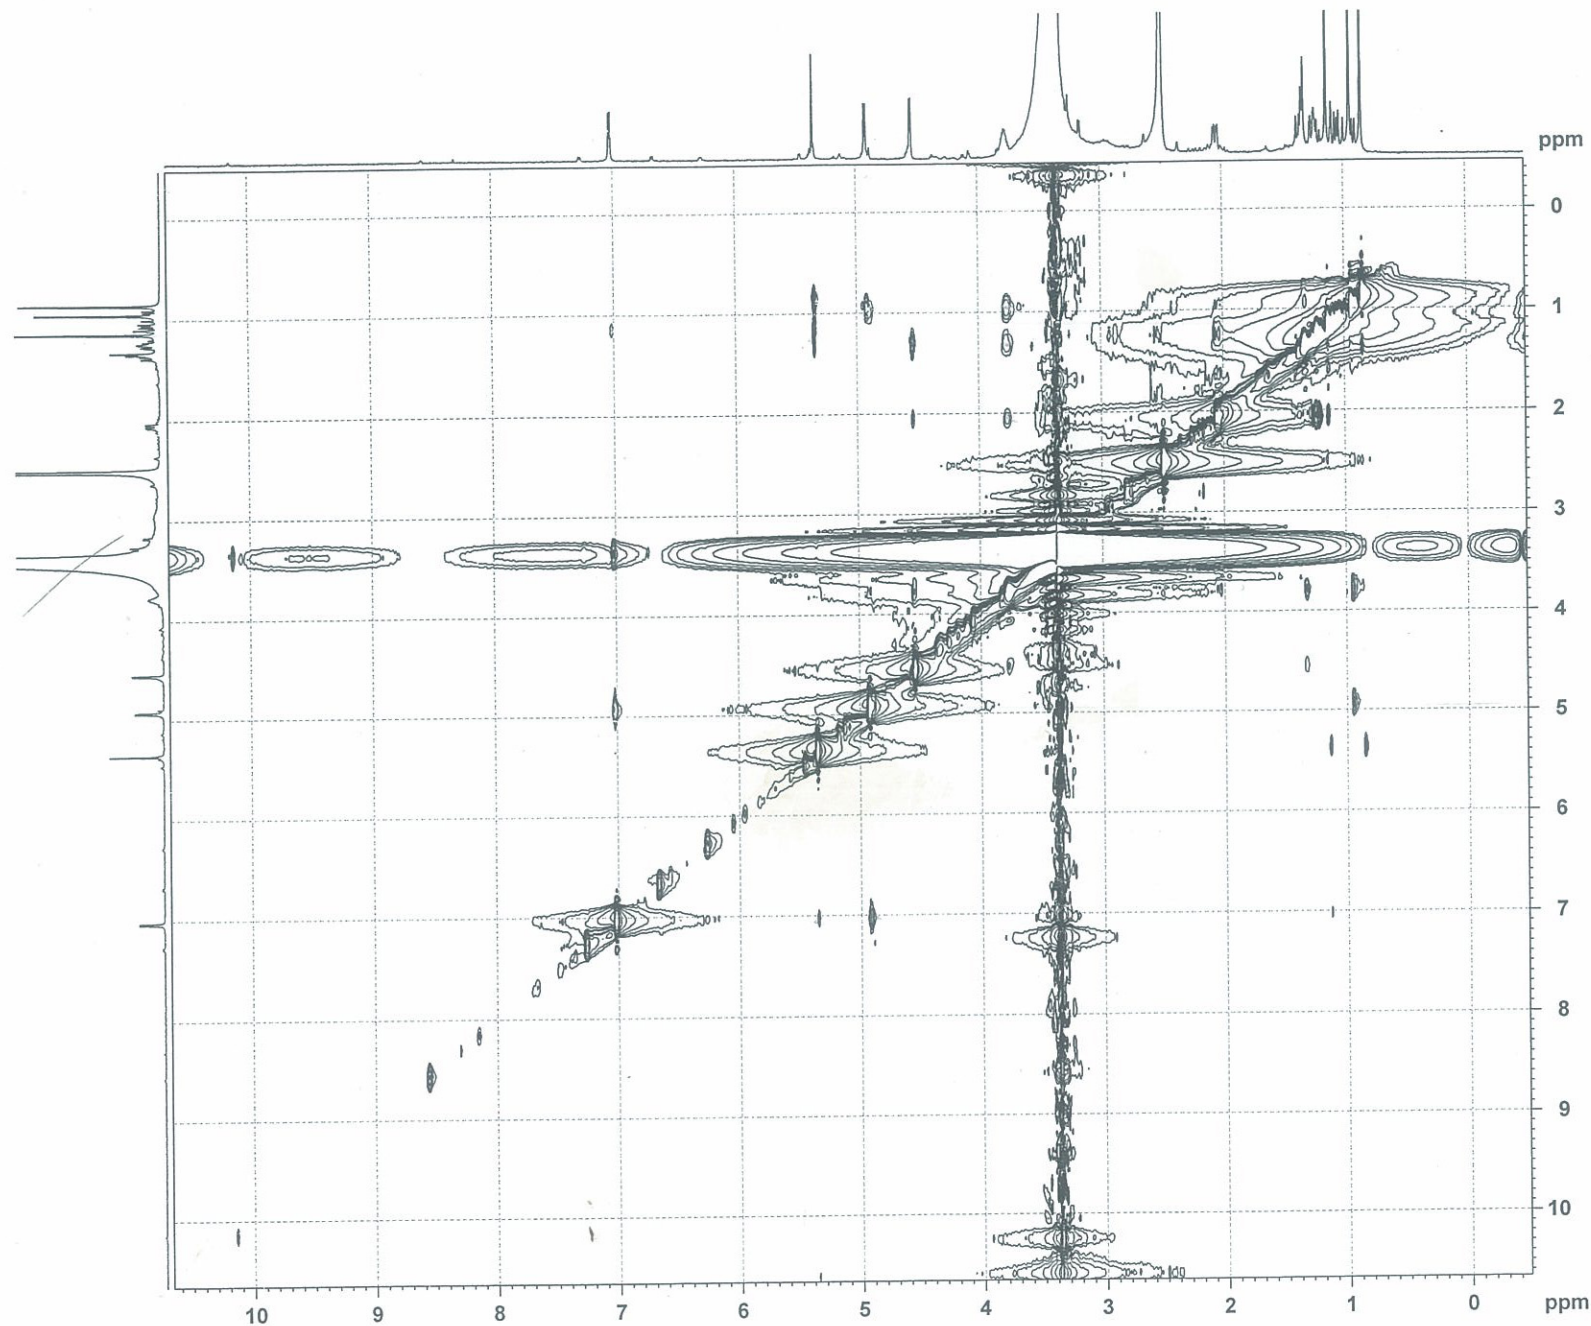

Supplement: s1 [file s1]
