# Supplementary figures and images for: Norisoprenoids from the Brown Alga Sargassum naozhouense Tseng et Lu
Source: MDPI journal article supplement (doi:10.3390/molecules23020348), 2018-02-07

Instrument:DSQ(Thermo)  
Ionization Method:EI  
D:\DSQ\DATA-LR\12\102501

10/25/2012 11:51:12 AM

S-E-3(1)

102501 #79 RT: 2.04 AV: 1 NL: 2.68E7  
T: + c Full ms [45.00-800.00]

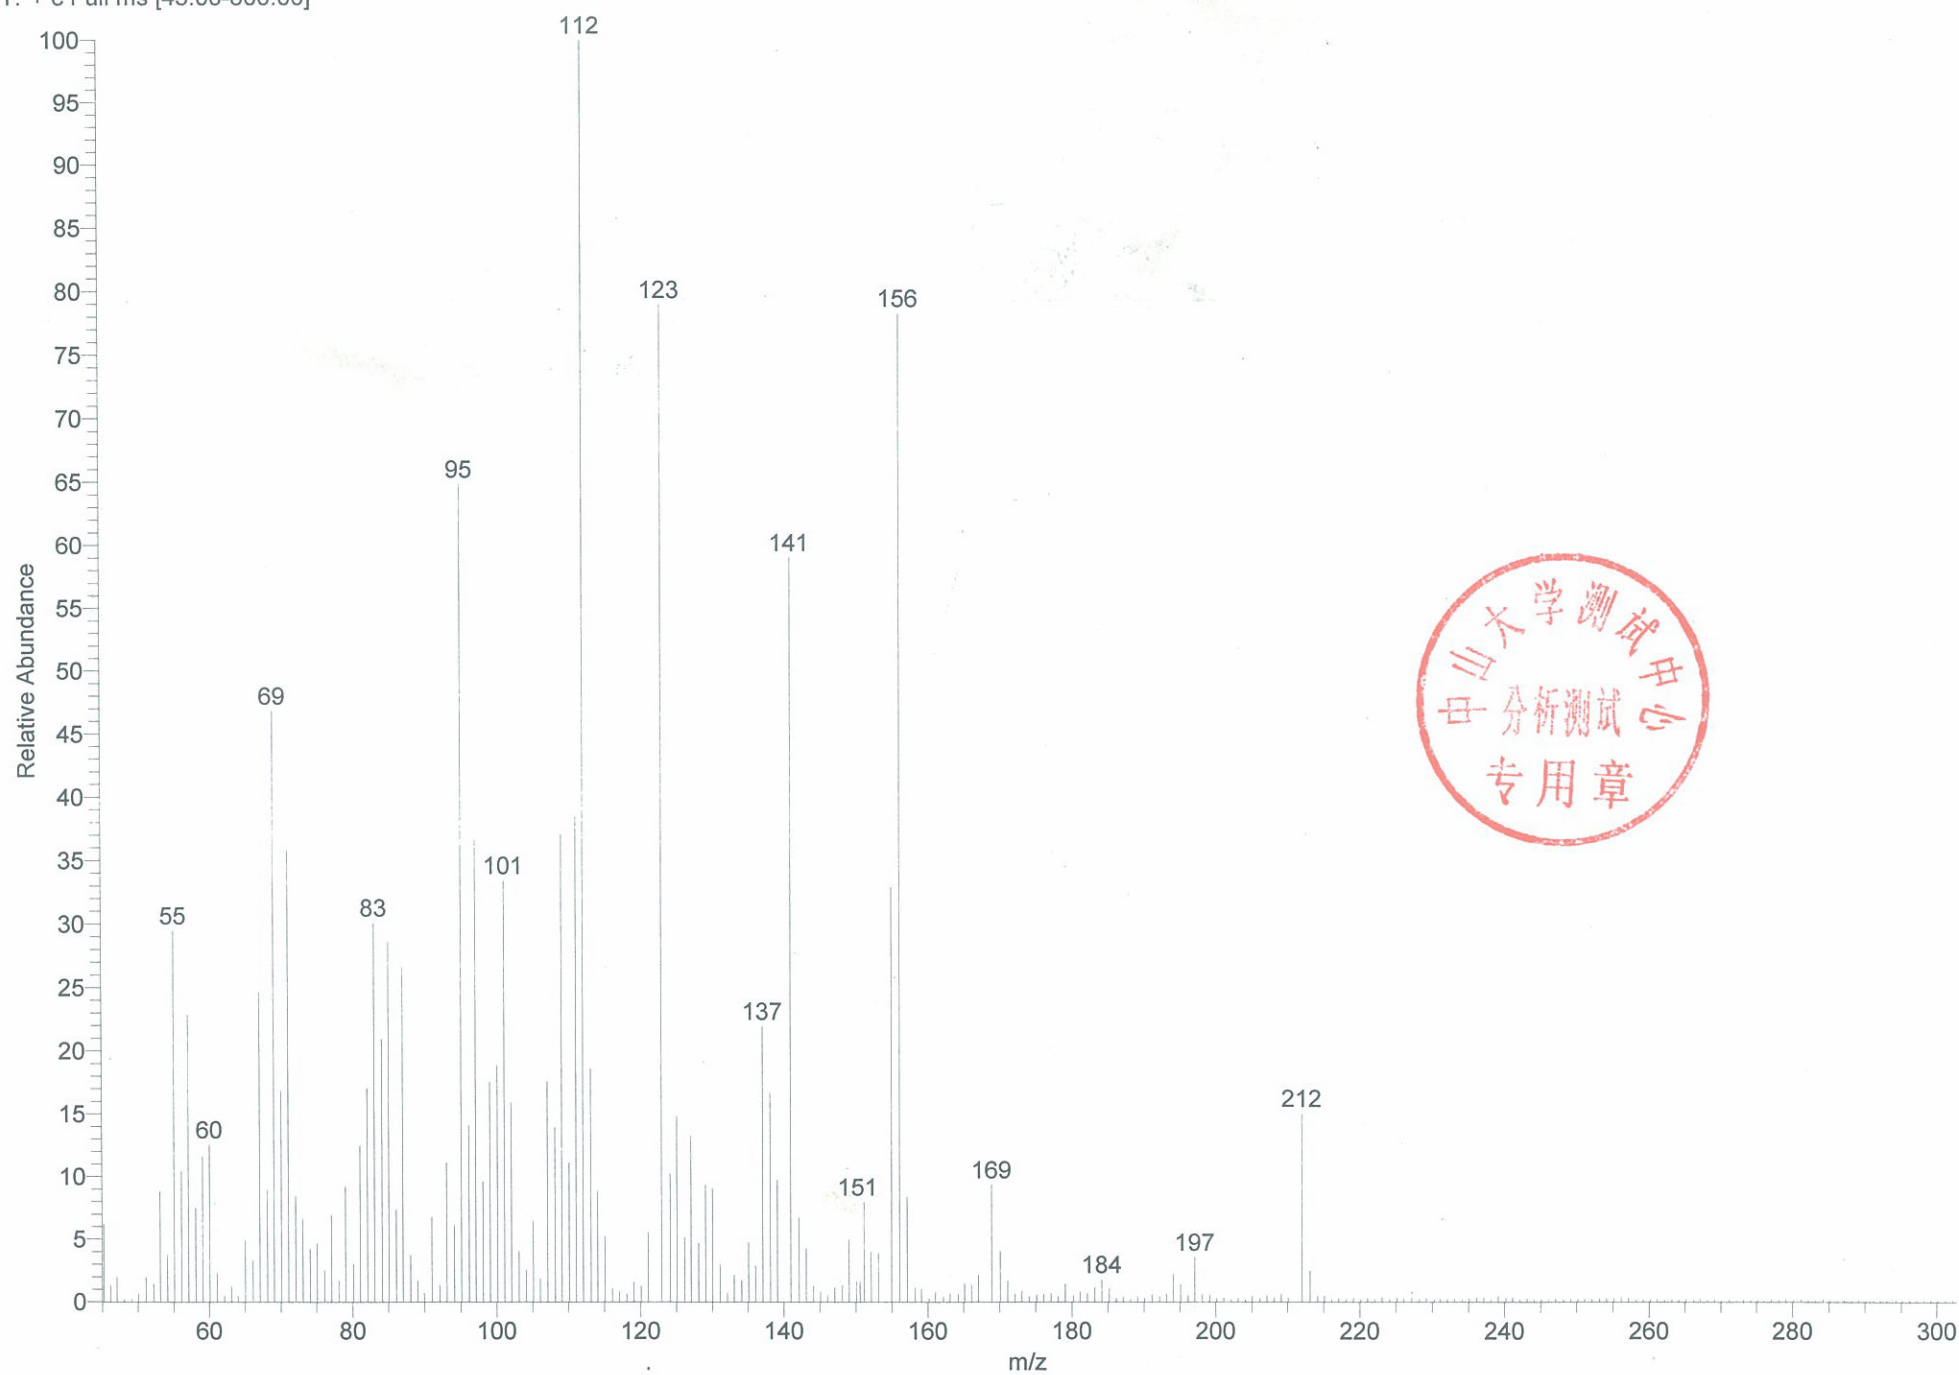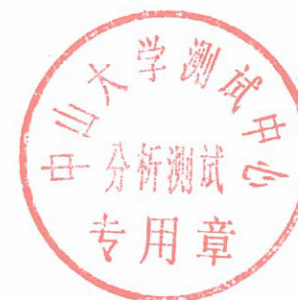

Supplement: s1 [file s1]

# **<sup>13</sup>C NMR Spectrum of S-E-3(1)**

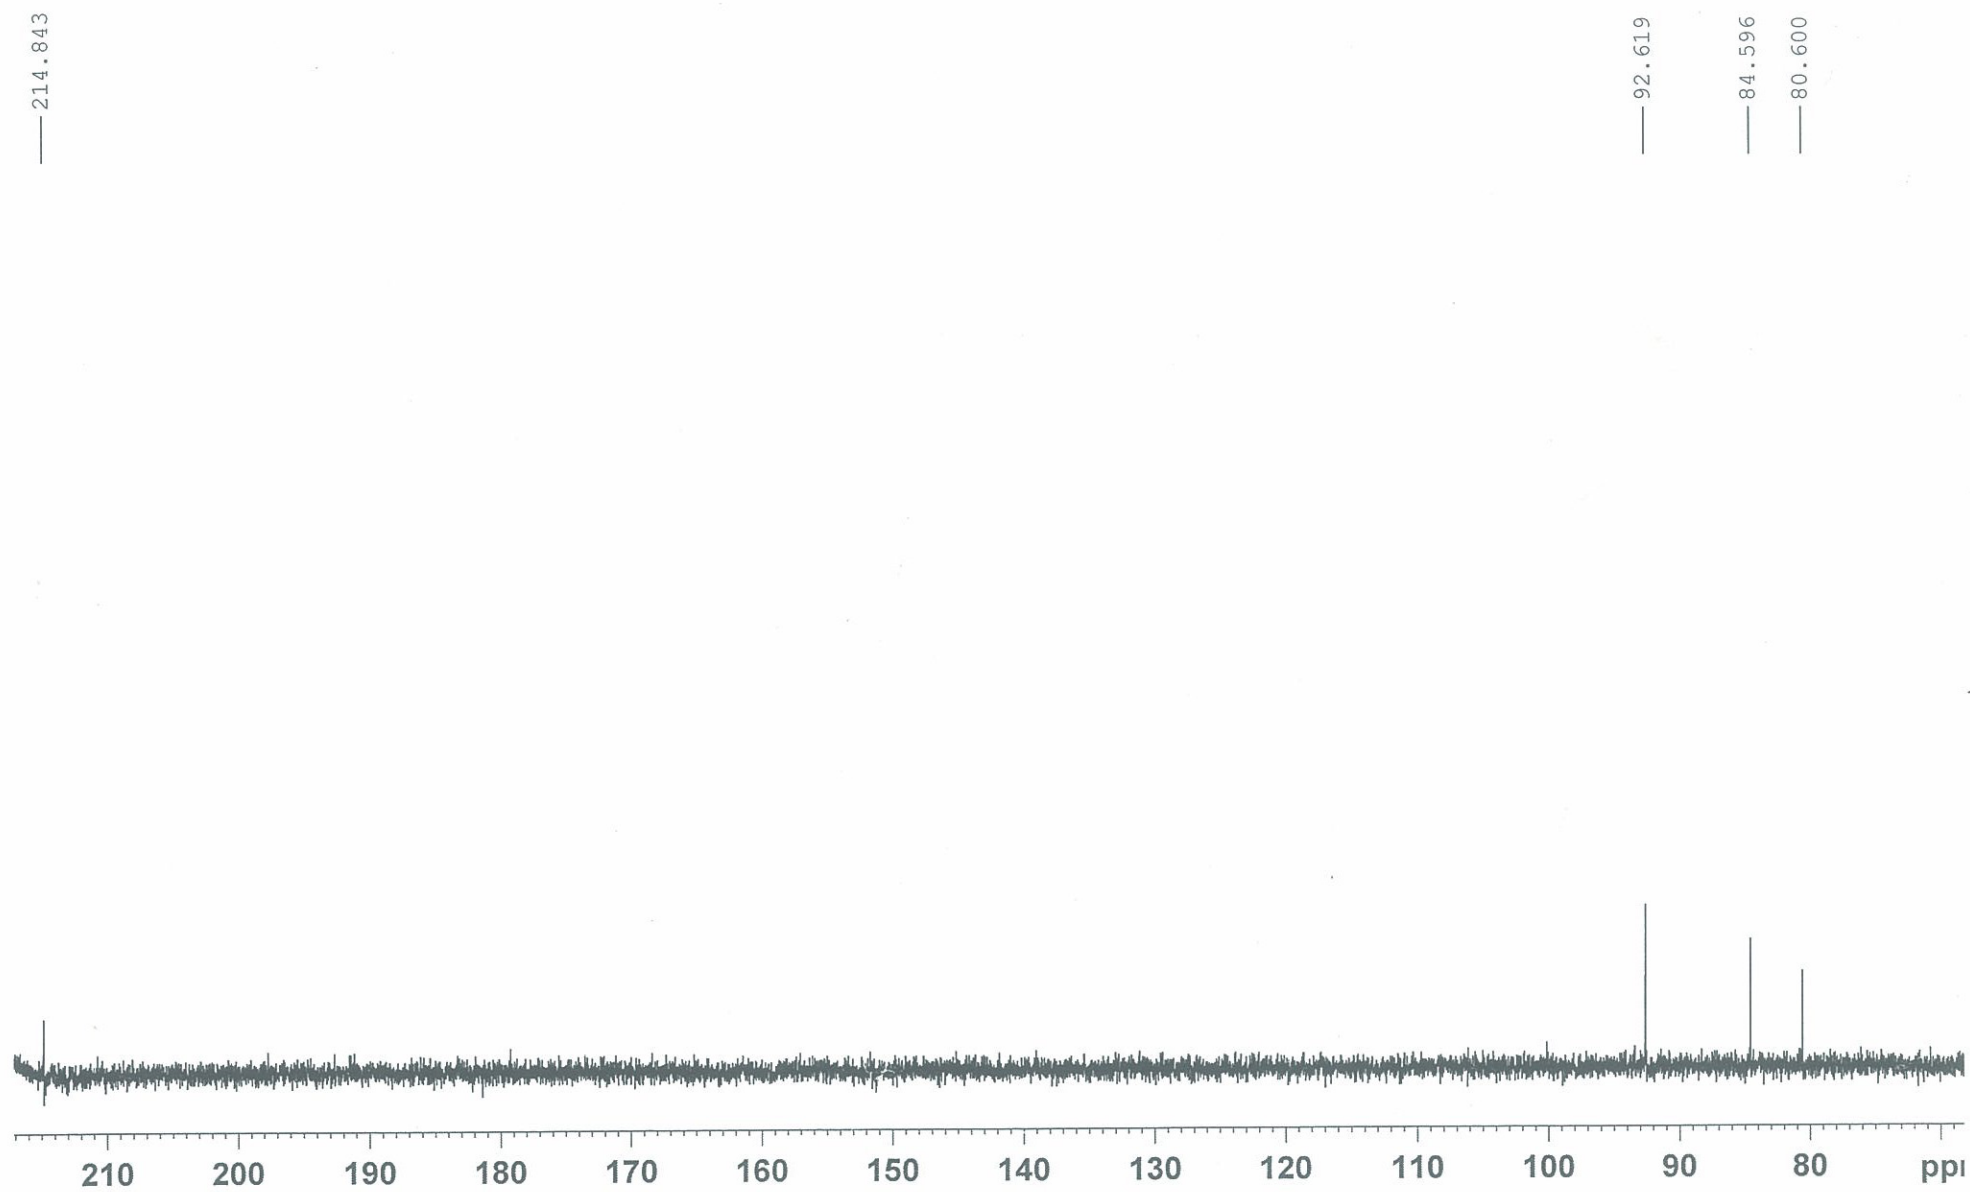

Supplement: s1 [file s1]

13C NMR Spectrum of S-E-3(1)

92.62  
84.60  
80.60  
61.61  
44.42  
43.14  
39.93  
39.76  
39.60  
39.43  
39.26  
39.09  
38.93  
37.13  
27.57  
26.07  
25.74

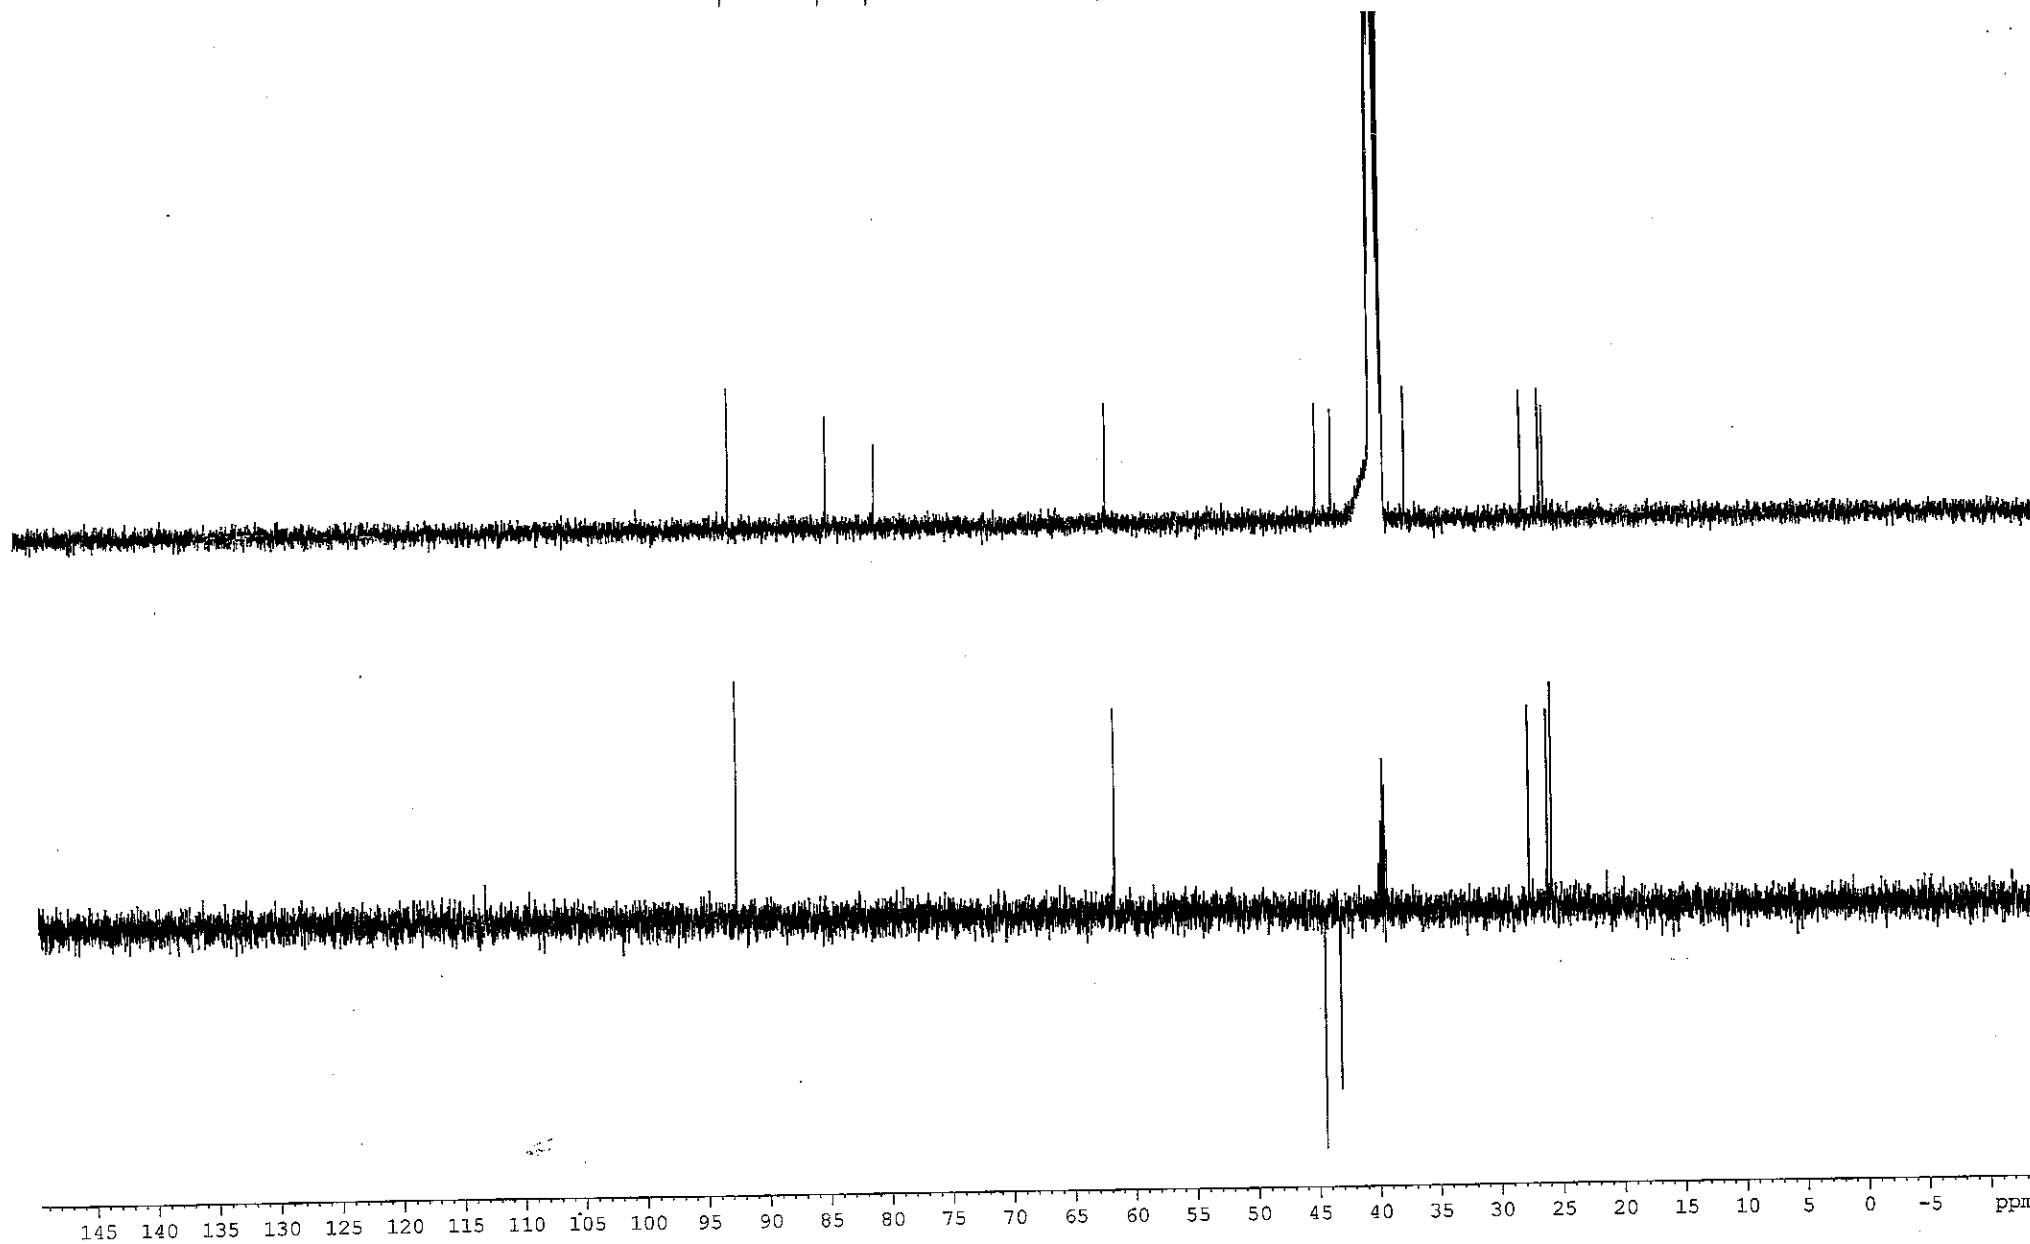

Supplement: s1 [file s1]
